# Supplementary material for: A meta-analysis of multiple stressors on seagrasses in the context of marine spatial cumulative impacts assessment
Source: PubMed Central journal article supplement (PMC7371696; doi:10.1038/s41598-020-68801-w), 2020-07-20
Supplement: 41598_2020_68801_MOESM1_ESM.pdf [file 41598_2020_68801_MOESM1_ESM.pdf]

## **Supplementary material**

**TITLE: A meta-analysis of multiple stressors on seagrasses in the context of marine spatial cumulative impacts assessment**

**AUTHORS:** Jackson Stockbridge<sup>1</sup>, Alice R. Jones<sup>1</sup> & Bronwyn M. Gillanders<sup>1</sup>

### **ORCHiD ID:**

Jackson Stockbridge: <https://orcid.org/0000-0001-9905-8234>

Alice R. Jones: <https://orcid.org/0000-0002-6157-2024>

Bronwyn M. Gillanders: <https://orcid.org/0000-0002-7680-2240>

### **AUTHOR ADDRESSES:**

<sup>1</sup>Southern Seas Ecology Laboratories and Environment Institute, Darling Building DX 650 418, School of Biological Sciences, University of Adelaide, SA 5005 AUSTRALIA

### **EMAIL:**

Jackson Stockbridge: [Jackson.stockbridge@adelaide.edu.au](mailto:Jackson.stockbridge@adelaide.edu.au)

Alice R. Jones: [alice.jones01@adelaide.edu.au](mailto:alice.jones01@adelaide.edu.au)

Bronwyn M. Gillanders: [bronwyn.gillanders@adelaide.edu.au](mailto:bronwyn.gillanders@adelaide.edu.au)

**Correspondence to:** [Jackson.stockbridge@adelaide.edu.au](mailto:Jackson.stockbridge@adelaide.edu.au)

**Supplementary Equation S1.** Calculations of standardised mean difference (SMD) as an effect size

SMD, or Hedge's  $d$ , was calculated as:

For stressor  $A$ :

$$d_A = \frac{(Y_A - Y_{ct})}{S} J(m)$$

For stressor  $B$ :

$$d_B = \frac{(Y_B - Y_{ct})}{S} J(m)$$

For interaction ( $AB$ ):

$$d_{AB} = \frac{(Y_{AB} - Y_B) - (Y_A - Y_{ct})}{2S} J(m)$$

Where  $Y_{ct}$ ,  $Y_A$ ,  $Y_B$  and  $Y_{AB}$  are the mean responses of the control, stressor  $A$ , stressor  $B$  and the interactive effect of  $A$  and  $B$ , respectively.  $S$  is the pooled sampling variance and  $J(m)$  is a correction factor for small sample bias<sup>1</sup>.  $J(m)$  is calculated as:

$$J(m) = 1 - \frac{3}{4(N_{AB} + N_A + N_B + N_{ct} - 4) - 1}$$

Pooled sampling variance was calculated as:

$$S = \sqrt{\frac{(N_{AB} - 1)(\sigma_{AB}^2) + (N_A - 1)(\sigma_A^2) + (N_B - 1)(\sigma_B^2) + (N_{ct} - 1)(\sigma_{ct}^2)}{N_{AB} + N_A + N_B + N_{ct} - 4}}$$

Where  $N$  is the sample size and  $\sigma$  the standard deviation of each treatment.

**Supplementary Table S2.** Summary information of studies included in this meta-analysis including each stressor combination tested.

| Study no. | Location           | Climate       | Species                   | Latitude | Longitude | Number of stressors | Response variable | Stressor 1  | Stressor 2                     | Stressor 3 | Reference |
|-----------|--------------------|---------------|---------------------------|----------|-----------|---------------------|-------------------|-------------|--------------------------------|------------|-----------|
| 1         | Portugal           | Temperate     | <i>Zostera noltii</i>     | 40.616   | -8.738    | 2                   | Survival          | Pollution   | Acidification                  | -          | 2         |
| 1         | Portugal           | Temperate     | <i>Zostera noltii</i>     | 40.616   | -8.738    | 2                   | Biomass           | Pollution   | Acidification                  | -          | 2         |
| 1         | Portugal           | Temperate     | <i>Zostera noltii</i>     | 40.616   | -8.738    | 2                   | Growth            | Pollution   | Acidification                  | -          | 2         |
| 2         | Mallorca           | Mediterranean | <i>Posidonia oceanica</i> | 39.35276 | 2.73665   | 2                   | Biomass           | Temperature | Competition                    | -          | 3         |
| 2         | Mallorca           | Mediterranean | <i>Posidonia oceanica</i> | 39.35276 | 2.73665   | 2                   | Mortality         | Temperature | Competition                    | -          | 3         |
| 2         | Mallorca           | Mediterranean | <i>Posidonia oceanica</i> | 39.35276 | 2.73665   | 2                   | Chemistry         | Temperature | Competition                    | -          | 3         |
| 2         | Mallorca           | Mediterranean | <i>Posidonia oceanica</i> | 39.35276 | 2.73665   | 2                   | Growth            | Temperature | Competition                    | -          | 3         |
| 3         | Alfacs Bay, NW Med | Mediterranean | <i>Cymodocea nodosa</i>   | 40.60495 | 0.68331   | 2                   | Chemistry         | Temperature | Nutrient enrichment - water    | -          | 4         |
| 3         | Alfacs Bay, NW Med | Mediterranean | <i>Cymodocea nodosa</i>   | 40.60495 | 0.68331   | 2                   | Growth            | Temperature | Nutrient enrichment - water    | -          | 4         |
| 3         | Alfacs Bay, NW Med | Mediterranean | <i>Cymodocea nodosa</i>   | 40.60495 | 0.68331   | 2                   | Mortality         | Temperature | Nutrient enrichment - water    | -          | 4         |
| 4         | Alfacs Bay, NW Med | Mediterranean | <i>Cymodocea nodosa</i>   | 40.60495 | 0.68331   | 2                   | Chemistry         | Temperature | Nutrient enrichment - sediment | -          | 4         |

| Study no. | Location           | Climate       | Species                   | Latitude | Longitude | Number of stressors | Response variable | Stressor 1  | Stressor 2                     | Stressor 3                  | Reference |
|-----------|--------------------|---------------|---------------------------|----------|-----------|---------------------|-------------------|-------------|--------------------------------|-----------------------------|-----------|
| 4         | Alfacs Bay, NW Med | Mediterranean | <i>Cymodocea nodosa</i>   | 40.60495 | 0.68331   | 2                   | Growth            | Temperature | Nutrient enrichment - sediment | -                           | 4         |
| 4         | Alfacs Bay, NW Med | Mediterranean | <i>Cymodocea nodosa</i>   | 40.60495 | 0.68331   | 2                   | Mortality         | Temperature | Nutrient enrichment - sediment | -                           | 4         |
| 5         | Denmark            | Temperate     | <i>Zostera marina</i>     | 55.7     | 11.78333  | 3                   | Growth            | Temperature | Low light                      | Nutrient enrichment - water | 5         |
| 5         | Denmark            | Temperate     | <i>Zostera marina</i>     | 55.7     | 11.78333  | 3                   | Biomass           | Temperature | Low light                      | Nutrient enrichment - water | 5         |
| 5         | Denmark            | Temperate     | <i>Zostera marina</i>     | 55.7     | 11.78333  | 3                   | Mortality         | Temperature | Low light                      | Nutrient enrichment - water | 5         |
| 5         | Denmark            | Temperate     | <i>Zostera marina</i>     | 55.7     | 11.78333  | 3                   | Chemistry         | Temperature | Low light                      | Nutrient enrichment - water | 5         |
| 6         | Sardinia           | Mediterranean | <i>Posidonia oceanica</i> | 40.56694 | 9.13472   | 2                   | Epiphytes         | Burial      | Nutrient enrichment - sediment | -                           | 6         |
| 6         | Sardinia           | Mediterranean | <i>Posidonia oceanica</i> | 40.56694 | 9.13472   | 2                   | Biomass           | Burial      | Nutrient enrichment - sediment | -                           | 6         |
| 6         | Sardinia           | Mediterranean | <i>Posidonia oceanica</i> | 40.56694 | 9.13472   | 2                   | Mortality         | Burial      | Nutrient enrichment - sediment | -                           | 6         |
| 6         | Sardinia           | Mediterranean | <i>Posidonia oceanica</i> | 40.56694 | 9.13472   | 2                   | Growth            | Burial      | Nutrient enrichment - sediment | -                           | 6         |
| 7         | Netherlands        | Temperate     | <i>Zostera noltii</i>     | 51.52778 | 3.94361   | 2                   | Biomass           | Low light   | Desiccation                    | -                           | 7         |

| Study no. | Location              | Climate     | Species                     | Latitude  | Longitude | Number of stressors | Response variable | Stressor 1                     | Stressor 2                  | Stressor 3 | Reference |
|-----------|-----------------------|-------------|-----------------------------|-----------|-----------|---------------------|-------------------|--------------------------------|-----------------------------|------------|-----------|
| 7         | Netherlands           | Temperate   | <i>Zostera noltii</i>       | 51.52778  | 3.94361   | 2                   | Growth            | Low light                      | Desiccation                 | -          | 7         |
| 8         | New York              | Subtropical | <i>Zostera marina</i>       | 41.41667  | -72.83333 | 2                   | Growth            | CO2                            | Competition                 | -          | 8         |
| 8         | New York              | Subtropical | <i>Zostera marina</i>       | 41.41667  | -72.83333 | 2                   | Chemistry         | CO2                            | Competition                 | -          | 8         |
| 9         | Queensland, Australia | Tropical    | <i>Halophila ovalis</i>     | -19.19111 | 146.85083 | 2                   | Growth            | Temperature                    | Photosynthesis inhibition   | -          | 9         |
| 10        | Germany               | Temperate   | <i>Zostera marina</i>       | 54.65     | 10.3      | 2                   | Growth            | Nutrient limitation - sediment | Infection                   | -          | 10        |
| 10        | Germany               | Temperate   | <i>Zostera marina</i>       | 54.65     | 10.3      | 2                   | Biomass           | Nutrient limitation - sediment | Infection                   | -          | 10        |
| 11        | Florida               | Subtropical | <i>Thalassia testudinum</i> | 29.33333  | -83.38333 | 2                   | Growth            | Hypersalinity                  | Infection                   | -          | 11        |
| 12        | Florida               | Subtropical | <i>Thalassia testudinum</i> | 29.33333  | -83.38333 | 2                   | Growth            | Temperature                    | Infection                   | -          | 11        |
| 13        | Florida               | Subtropical | <i>Thalassia testudinum</i> | 29.33333  | -83.38333 | 2                   | Growth            | Photosynthesis inhibition      | Infection                   | -          | 11        |
| 14        | Florida               | Subtropical | <i>Thalassia testudinum</i> | 29.33333  | -83.38333 | 2                   | Growth            | Hypoxia                        | Infection                   | -          | 11        |
| 15        | Denmark               | Temperate   | <i>Zostera marina</i>       | 55.48611  | 9.75556   | 2                   | Mortality         | Light                          | Habitat modification        | -          | 12        |
| 16        | Denmark               | Temperate   | <i>Zostera marina</i>       | 55.71222  | 11.79306  | 2                   | Growth            | Hyposalinity                   | Nutrient enrichment - water | -          | 13        |
| 16        | Denmark               | Temperate   | <i>Zostera marina</i>       | 55.71222  | 11.79306  | 2                   | Biomass           | Hyposalinity                   | Nutrient enrichment - water | -          | 13        |
| 16        | Denmark               | Temperate   | <i>Zostera marina</i>       | 55.71222  | 11.79306  | 2                   | Mortality         | Hyposalinity                   | Nutrient enrichment - water | -          | 13        |

| Study no. | Location      | Climate       | Species                      | Latitude  | Longitude  | Number of stressors | Response variable | Stressor 1           | Stressor 2                     | Stressor 3 | Reference |
|-----------|---------------|---------------|------------------------------|-----------|------------|---------------------|-------------------|----------------------|--------------------------------|------------|-----------|
| 17        | Denmark       | Temperate     | <i>Zostera marina</i>        | 55.71222  | 11.79306   | 2                   | Mortality         | Temperature          | Hyposalinity                   | -          | 14        |
| 17        | Denmark       | Temperate     | <i>Zostera marina</i>        | 55.71222  | 11.79306   | 2                   | Growth            | Temperature          | Hyposalinity                   | -          | 14        |
| 17        | Denmark       | Temperate     | <i>Zostera marina</i>        | 55.71222  | 11.79306   | 2                   | Biomass           | Temperature          | Hyposalinity                   | -          | 14        |
| 18        | Oregon, USA   | Cool arid     | <i>Zostera marina</i>        | 44.60639  | -124.07472 | 2                   | Growth            | Temperature          | Nutrient enrichment - water    | -          | 15        |
| 19        | Netherlands   | Temperate     | <i>Zostera noltii</i>        | 51.65     | 4.01667    | 2                   | Biomass           | Organic matter       | Suspended sediment             | -          | 16        |
| 19        | Netherlands   | Temperate     | <i>Zostera noltii</i>        | 51.65     | 4.01667    | 2                   | Epiphytes         | Organic matter       | Suspended sediment             | -          | 16        |
| 20        | Shark Bay, WA | Temperate     | <i>Amphibolis antarctica</i> | -25.93333 | 113.54222  | 2                   | Biomass           | Temperature          | Suspended sediment             | -          | 17        |
| 21        | Denmark       | Temperate     | <i>Zostera marina</i>        | 55.79456  | 11.77713   | 2                   | Growth            | Low light            | Nutrient enrichment - sediment | -          | 18        |
| 21        | Denmark       | Temperate     | <i>Zostera marina</i>        | 55.79456  | 11.77713   | 2                   | Mortality         | Low light            | Nutrient enrichment - sediment | -          | 18        |
| 21        | Denmark       | Temperate     | <i>Zostera marina</i>        | 55.79456  | 11.77713   | 2                   | Biomass           | Low light            | Nutrient enrichment - sediment | -          | 18        |
| 21        | Denmark       | Temperate     | <i>Zostera marina</i>        | 55.79456  | 11.77713   | 2                   | Survival          | Low light            | Nutrient enrichment - sediment | -          | 18        |
| 22        | Spain         | Mediterranean | <i>Posidonia oceanica</i>    | 41.68417  | 2.81861    | 2                   | Biomass           | Habitat modification | Herbivory                      | -          | 19        |

| Study no. | Location      | Climate       | Species                   | Latitude  | Longitude | Number of stressors | Response variable | Stressor 1           | Stressor 2                     | Stressor 3 | Reference |
|-----------|---------------|---------------|---------------------------|-----------|-----------|---------------------|-------------------|----------------------|--------------------------------|------------|-----------|
| 22        | Spain         | Mediterranean | <i>Posidonia oceanica</i> | 41.68417  | 2.81861   | 2                   | Growth            | Habitat modification | Herbivory                      | -          | 19        |
| 22        | Spain         | Mediterranean | <i>Posidonia oceanica</i> | 41.68417  | 2.81861   | 2                   | Chemistry         | Habitat modification | Herbivory                      | -          | 19        |
| 23        | Netherlands   | Temperate     | <i>Zostera noltii</i>     | 51.56639  | 3.94906   | 2                   | Biomass           | Wave exposure        | Suspended sediment             | -          | 20        |
| 24        | Perth, WA     | Temperate     | <i>Halophila ovalis</i>   | -32.00716 | 115.79298 | 3                   | Mortality         | Temperature          | Competition                    | Herbivory  | 21        |
| 24        | Perth, WA     | Temperate     | <i>Halophila ovalis</i>   | -32.00716 | 115.79298 | 3                   | Biomass           | Temperature          | Competition                    | Herbivory  | 21        |
| 25        | Perth, WA     | Temperate     | <i>Halophila ovalis</i>   | -31.98333 | 115.81667 | 2                   | Growth            | Temperature          | Competition                    | -          | 22        |
| 25        | Perth, WA     | Temperate     | <i>Halophila ovalis</i>   | -31.98333 | 115.81667 | 2                   | Biomass           | Temperature          | Competition                    | -          | 22        |
| 26        | Virginia, USA | Subtropical   | <i>Zostera marina</i>     | 39.52583  | -77.05806 | 3                   | Epiphytes         | Temperature          | Hyposalinity                   | Herbivory  | 23        |
| 26        | Virginia, USA | Subtropical   | <i>Zostera marina</i>     | 39.52583  | -77.05806 | 3                   | Biomass           | Temperature          | Hyposalinity                   | Herbivory  | 23        |
| 26        | Virginia, USA | Subtropical   | <i>Zostera marina</i>     | 39.52583  | -77.05806 | 3                   | Growth            | Temperature          | Hyposalinity                   | Herbivory  | 23        |
| 26        | Virginia, USA | Subtropical   | <i>Zostera marina</i>     | 39.52583  | -77.05806 | 3                   | Biodiversity      | Temperature          | Hyposalinity                   | Herbivory  | 23        |
| 27        | Denmark       | Temperate     | <i>Zostera marina</i>     | 55.5      | 9.66667   | 2                   | Survival          | Temperature          | Competition                    | -          | 24        |
| 28        | Denmark       | Temperate     | <i>Zostera marina</i>     | 55.51588  | 9.67549   | 2                   | Growth            | Hypoxia              | Nutrient enrichment - sediment | -          | 25        |
| 28        | Denmark       | Temperate     | <i>Zostera marina</i>     | 55.51588  | 9.67549   | 2                   | Survival          | Hypoxia              | Nutrient enrichment - sediment | -          | 25        |

| Study no. | Location | Climate       | Species                     | Latitude | Longitude | Number of stressors | Response variable | Stressor 1                     | Stressor 2                  | Stressor 3 | Reference |
|-----------|----------|---------------|-----------------------------|----------|-----------|---------------------|-------------------|--------------------------------|-----------------------------|------------|-----------|
| 29        | Germany  | Temperate     | <i>Zostera marina</i>       | 54.35    | 10.15     | 2                   | Epiphytes         | Nutrient enrichment - water    | Herbivory                   | -          | 26        |
| 29        | Germany  | Temperate     | <i>Zostera marina</i>       | 54.35    | 10.15     | 2                   | Growth            | Nutrient enrichment - water    | Herbivory                   | -          | 26        |
| 29        | Germany  | Temperate     | <i>Zostera marina</i>       | 54.35    | 10.15     | 2                   | Chemistry         | Nutrient enrichment - water    | Herbivory                   | -          | 26        |
| 30        | Spain    | Mediterranean | <i>Zostera noltii</i>       | 36.5     | -6.16667  | 2                   | Growth            | Low light                      | Nutrient enrichment - water | -          | 27        |
| 31        | Spain    | Mediterranean | <i>Posidonia oceanica</i>   | 42.04217 | 3.21434   | 2                   | Biomass           | Nutrient enrichment - sediment | Photosynthesis inhibition   | -          | 28        |
| 31        | Spain    | Mediterranean | <i>Posidonia oceanica</i>   | 42.04217 | 3.21434   | 2                   | Mortality         | Nutrient enrichment - sediment | Photosynthesis inhibition   | -          | 28        |
| 31        | Spain    | Mediterranean | <i>Posidonia oceanica</i>   | 42.04217 | 3.21434   | 2                   | Chemistry         | Nutrient enrichment - sediment | Photosynthesis inhibition   | -          | 28        |
| 32        | Florida  | Subtropical   | <i>Thalassia testudinum</i> | 25.04639 | -80.75306 | 3                   | Growth            | Photosynthesis inhibition      | Hypersalinity               | Hypoxia    | 29        |
| 32        | Florida  | Subtropical   | <i>Thalassia testudinum</i> | 25.04639 | -80.75306 | 3                   | Survival          | Photosynthesis inhibition      | Hypersalinity               | Hypoxia    | 29        |
| 33        | Florida  | Subtropical   | <i>Thalassia testudinum</i> | 24.92222 | -80.7925  | 2                   | Growth            | Temperature                    | Photosynthesis inhibition   | -          | 30        |
| 33        | Florida  | Subtropical   | <i>Thalassia testudinum</i> | 24.92222 | -80.7925  | 2                   | Biomass           | Temperature                    | Photosynthesis inhibition   | -          | 30        |
| 34        | Florida  | Subtropical   | <i>Halodule wrightii</i>    | 25.22806 | -80.79361 | 2                   | Growth            | Temperature                    | Photosynthesis inhibition   | -          | 30        |



| Study no. | Location      | Climate     | Species                     | Latitude | Longitude | Number of stressors | Response variable | Stressor 1                  | Stressor 2                | Stressor 3                | Reference |
|-----------|---------------|-------------|-----------------------------|----------|-----------|---------------------|-------------------|-----------------------------|---------------------------|---------------------------|-----------|
| 34        | Florida       | Subtropical | <i>Halodule wrightii</i>    | 25.22806 | -80.79361 | 2                   | Biomass           | Temperature                 | Photosynthesis inhibition | -                         | 30        |
| 35        | Virginia, USA | Subtropical | <i>Zostera marina</i>       | 37.21667 | -76.38333 | 2                   | Epiphytes         | Nutrient enrichment - water | Herbivory                 | -                         | 31        |
| 35        | Virginia, USA | Subtropical | <i>Zostera marina</i>       | 37.21667 | -76.38333 | 2                   | Biomass           | Nutrient enrichment - water | Herbivory                 | -                         | 31        |
| 35        | Virginia, USA | Subtropical | <i>Zostera marina</i>       | 37.21667 | -76.38333 | 2                   | Mortality         | Nutrient enrichment - water | Herbivory                 | -                         | 31        |
| 35        | Virginia, USA | Subtropical | <i>Zostera marina</i>       | 37.21667 | -76.38333 | 2                   | Biodiversity      | Nutrient enrichment - water | Herbivory                 | -                         | 31        |
| 36        | Florida       | Subtropical | <i>Thalassia testudinum</i> | 25.0325  | -80.50194 | 2                   | Growth            | Nutrient limitation - water | Hyposalinity              | -                         | 32        |
| 37        | Florida       | Subtropical | <i>Thalassia testudinum</i> | 25.0325  | -80.50194 | 2                   | Growth            | Nutrient enrichment - water | Hyposalinity              | -                         | 32        |
| 38        | Florida       | Subtropical | <i>Thalassia testudinum</i> | 25.0325  | -80.50194 | 2                   | Growth            | Nutrient limitation - water | Hypersalinity             | -                         | 32        |
| 39        | Florida       | Subtropical | <i>Thalassia testudinum</i> | 25.0325  | -80.50194 | 2                   | Growth            | Nutrient enrichment - water | Hypersalinity             | -                         | 32        |
| 40        | Florida       | Subtropical | <i>Thalassia testudinum</i> | 25.125   | -80.45083 | 3                   | Growth            | Temperature                 | Hypersalinity             | Photosynthesis inhibition | 33        |
| 40        | Florida       | Subtropical | <i>Thalassia testudinum</i> | 25.125   | -80.45083 | 3                   | Biomass           | Temperature                 | Hypersalinity             | Photosynthesis inhibition | 33        |
| 41        | Virginia, USA | Subtropical | <i>Zostera marina</i>       | 37       | -75       | 2                   | Growth            | Low light                   | Photosynthesis inhibition | -                         | 34        |

**Supplementary Table S3.** Summary of individual, combined and interaction type of each stressor and stressor combinations. When the individual effect sizes for all stressors were positive, an interaction effect size less than zero was classified as antagonistic, and if the interaction was more than 0 it was classified as synergistic (Fig. 5). For a visualisation of all effect size definitions, see Fig. 5.

| Stressor A               | Stressor B                | Stressor C | Response variable | Individual effect A | Individual effect B | Individual effect C | Interaction effect | Interaction lower CI | Interaction upper CI | Interaction type | Direction (if synergistic) | Reference |
|--------------------------|---------------------------|------------|-------------------|---------------------|---------------------|---------------------|--------------------|----------------------|----------------------|------------------|----------------------------|-----------|
| Pollution                | Acidification             | -          | Biomass           | 1.92                | 0                   | -                   | 1.02               | 0.38                 | 1.67                 | Antagonistic     | -                          | 2         |
| Pollution                | Acidification             | -          | Biomass           | 1.91                | -0.443              | -                   | 1.95               | 1.21                 | 2.68                 | Antagonistic     | -                          | 2         |
| Light                    | High nutrients - water    | -          | Biomass           | 1.2                 | 0.265               | -                   | 1.47               | -0.332               | 3.28                 | Additive         | -                          | 5         |
| Temperature              | High nutrients - water    | Light      | Biomass           | 0.822               | 0.265               | 1.2                 | 1.34               | -0.43                | 3.11                 | Additive         | -                          | 5         |
| Temperature              | Light                     | -          | Biomass           | 0.822               | 1.2                 | -                   | 1.89               | -0.0336              | 3.82                 | Additive         | -                          | 5         |
| Temperature              | High nutrients - water    | -          | Biomass           | 0.822               | 0.265               | -                   | 1.31               | -0.452               | 3.08                 | Additive         | -                          | 5         |
| Burial                   | High nutrients - sediment | -          | Biomass           | 0.125               | -0.417              | -                   | 0.616              | -0.329               | 1.56                 | Additive         | -                          | 6         |
| Burial                   | High nutrients - sediment | -          | Biomass           | 0.451               | -0.344              | -                   | 0.741              | -0.214               | 1.7                  | Additive         | -                          | 6         |
| Burial                   | High nutrients - sediment | -          | Biomass           | -0.461              | -0.00376            | -                   | -0.266             | -1.19                | 0.662                | Additive         | -                          | 6         |
| Light                    | Desiccation               | -          | Biomass           | 0.587               | 1.08                | -                   | 1.08               | -0.247               | 2.41                 | Additive         | -                          | 7         |
| Light                    | Desiccation               | -          | Biomass           | 0.74                | 0.639               | 0.801               | -                  | -0.488               | 2.09                 | Additive         | -                          | 7         |
| Light                    | Desiccation               | -          | Biomass           | 0.62                | 1.31                | -                   | 1.42               | 0.0312               | 2.8                  | Synergistic      | Positive                   | 7         |
| Light                    | Desiccation               | -          | Biomass           | -0.437              | 0.644               | -                   | -0.4               | -1.65                | 0.852                | Additive         | -                          | 7         |
| Low nutrients - sediment | Infection                 | -          | Biomass           | 1.64                | 1.39                | -                   | 2.58               | 0.413                | 4.74                 | Additive         | -                          | 10        |
| Hyposalinity             | High nutrients - water    | -          | Biomass           | 1.39                | -1.67               | -                   | -0.277             | -1.89                | 1.33                 | Additive         | -                          | 13        |

| Stressor A           | Stressor B                | Stressor C | Response variable | Individual effect A | Individual effect B | Individual effect C | Interaction effect | Interaction lower CI | Interaction upper CI | Interaction type | Direction (if synergistic) | Reference |
|----------------------|---------------------------|------------|-------------------|---------------------|---------------------|---------------------|--------------------|----------------------|----------------------|------------------|----------------------------|-----------|
| Hyposalinity         | Temperature               | -          | Biomass           | 0.3                 | 0.0907              | -                   | 1.54               | -0.285               | 3.36                 | Additive         | -                          | 14        |
| Hyposalinity         | Temperature               | -          | Biomass           | -0.678              | 0.489               | -                   | 1.04               | -0.669               | 2.74                 | Additive         | -                          | 14        |
| Organic matter       | Suspended sediment        | -          | Biomass           | 8.78                | 4.05                | -                   | 4.35               | 2.08                 | 6.63                 | Synergistic      | Positive                   | 16        |
| Temperature          | Suspended sediment        | -          | Biomass           | -0.893              | 1.03                | -                   | 0.147              | -0.432               | 0.725                | Additive         | -                          | 17        |
| Temperature          | Suspended sediment        | -          | Biomass           | 1.29                | 0.227               | -                   | 1.46               | 0.81                 | 2.11                 | Synergistic      | Positive                   | 17        |
| Light                | High nutrients - water    | -          | Biomass           | -0.571              | -0.619              | -                   | -2.64              | -4.83                | -0.453               | Synergistic      | Negative                   | 18        |
| Light                | High nutrients - sediment | -          | Biomass           | 0.296               | 0.28                | -                   | 4.79               | 1.64                 | 7.94                 | Synergistic      | Positive                   | 18        |
| Habitat modification | Herbivory                 | -          | Biomass           | 0.8                 | 1.16                | -                   | 2.46               | 1.3                  | 3.62                 | Synergistic      | Positive                   | 19        |
| Habitat modification | Herbivory                 | -          | Biomass           | 0.746               | -0.0897             | -                   | -0.448             | -1.34                | 0.439                | Additive         | -                          | 19        |
| Wave exposure        | Suspended sediment        | -          | Biomass           | 0.95                | 1.08                | -                   | 1.25               | 0.371                | 2.12                 | Synergistic      | Positive                   | 20        |
| Competition          | Herbivory                 | -          | Biomass           | 0.02                | -0.0177             | -                   | -0.602             | -2.24                | 1.03                 | Additive         | -                          | 21        |
| Temperature          | Competition               | Herbivory  | Biomass           | 0                   | 0.02                | -0.0177             | 0.0436             | -1.56                | 1.64                 | Additive         | -                          | 21        |
| Temperature          | Competition               | -          | Biomass           | 0                   | 0.02                | -                   | 1.46               | -0.342               | 3.26                 | Additive         | -                          | 21        |
| Temperature          | Herbivory                 | -          | Biomass           | 0                   | -0.0177             | -                   | 0.748              | -0.907               | 2.4                  | Additive         | -                          | 21        |
| Temperature          | Competition               | -          | Biomass           | 0.632               | 5.37                | -                   | 5.42               | 2.74                 | 8.11                 | Synergistic      | Positive                   | 22        |
| Temperature          | Competition               | -          | Biomass           | 1.01                | 6.83                | -                   | 2.93               | 1.15                 | 4.72                 | Synergistic      | Positive                   | 22        |
| Temperature          | Competition               | -          | Biomass           | 2.35                | 4.76                | -                   | 5.84               | 3                    | 8.69                 | Synergistic      | Positive                   | 22        |
| Hyposalinity         | Herbivory                 | -          | Biomass           | 0.697               | 0.606               | -                   | 0.483              | -1.14                | 2.11                 | Additive         | -                          | 23        |
| Temperature          | Hyposalinity              | Herbivory  | Biomass           | 0.702               | 0.697               | 0.606               | 0.343              | -1.27                | 1.95                 | Additive         | -                          | 23        |
| Temperature          | Hyposalinity              | -          | Biomass           | 0.702               | 0.697               | -                   | 0.435              | -1.18                | 2.05                 | Additive         | -                          | 23        |

| Stressor A                | Stressor B                | Stressor C | Response variable | Individual effect A | Individual effect B | Individual effect C | Interaction effect | Interaction lower CI | Interaction upper CI | Interaction type | Direction (if synergistic) | Reference |
|---------------------------|---------------------------|------------|-------------------|---------------------|---------------------|---------------------|--------------------|----------------------|----------------------|------------------|----------------------------|-----------|
| Temperature               | Herbivory                 | -          | Biomass           | 0.702               | 0.606               | -                   | 0.676              | -0.969               | 2.32                 | Additive         | -                          | 23        |
| Hyposalinity              | Herbivory                 | -          | Biomass           | -0.242              | -0.0175             | -                   | 0.171              | -1.43                | 1.77                 | Additive         | -                          | 23        |
| Temperature               | Hyposalinity              | Herbivory  | Biomass           | -0.0938             | -0.242              | -0.0175             | 0.0831             | -1.52                | 1.68                 | Additive         | -                          | 23        |
| Temperature               | Hyposalinity              | -          | Biomass           | -0.0938             | -0.242              | -                   | 0.495              | -1.13                | 2.12                 | Additive         | -                          | 23        |
| Temperature               | Herbivory                 | -          | Biomass           | -0.0938             | -0.0175             | -                   | 0.572              | -1.06                | 2.2                  | Additive         | -                          | 23        |
| Photosynthesis inhibition | High nutrients – sediment | -          | Biomass           | 2.05                | NA                  | -                   | 1.86               | -0.0528              | 3.78                 | Additive         | -                          | 28        |
| Photosynthesis inhibition | High nutrients - sediment | -          | Biomass           | 0.601               | NA                  | -                   | 0.96               | -0.73                | 2.65                 | Additive         | -                          | 28        |
| Photosynthesis inhibition | High nutrients - sediment | -          | Biomass           | 0.895               | NA                  | -                   | -0.0412            | -1.64                | 1.56                 | Additive         | -                          | 28        |
| Herbivory                 | High nutrients - water    | -          | Biomass           | 4.24                | 2.15                | -                   | 1.76               | 0.304                | 3.23                 | Synergistic      | Positive                   | 31        |
| Hyposalinity              | Herbivory                 | -          | Biodiversity      | 0.254               | 0.761               | -                   | 1.09               | -0.625               | 2.81                 | Additive         | -                          | 23        |
| Temperature               | Hyposalinity              | Herbivory  | Biodiversity      | 0.334               | 0.254               | 0.761               | 0.775              | -0.884               | 2.43                 | Additive         | -                          | 23        |
| Temperature               | Hyposalinity              | -          | Biodiversity      | 0.334               | 0.254               | -                   | -0.249             | -1.86                | 1.36                 | Additive         | -                          | 23        |
| Temperature               | Herbivory                 | -          | Biodiversity      | 0.334               | 0.761               | -                   | 0.988              | -0.707               | 2.68                 | Additive         | -                          | 23        |
| Herbivory                 | High nutrients - water    | -          | Biodiversity      | -0.292              | -1.5                | -                   | -0.0386            | -1.28                | 1.2                  | Additive         | -                          | 31        |
| Herbivory                 | High nutrients - water    | -          | Biodiversity      | 0.593               | 1.73                | -                   | 1.8                | 0.33                 | 3.27                 | Synergistic      | Positive                   | 31        |
| Herbivory                 | High nutrients - water    | -          | Biodiversity      | 0.456               | 1.1                 | -                   | 0.957              | -0.352               | 2.27                 | Additive         | -                          | 31        |
| Herbivory                 | High nutrients - water    | -          | Biodiversity      | -0.501              | 0.915               | -                   | 1.02               | -0.297               | 2.34                 | Additive         | -                          | 31        |
| Temperature               | Competition               | -          | Chemistry         | -1.21               | -0.506              | -                   | -0.704             | -2.13                | 0.724                | Additive         | -                          | 3         |
| Temperature               | Competition               | -          | Chemistry         | -4.6                | 0.157               | -                   | -2.38              | -4.2                 | -0.571               | Synergistic      | Negative                   | 3         |

| Stressor A  | Stressor B                | Stressor C             | Response variable | Individual effect A | Individual effect B | Individual effect C | Interaction effect | Interaction lower CI | Interaction upper CI | Interaction type | Direction (if synergistic) | Reference |
|-------------|---------------------------|------------------------|-------------------|---------------------|---------------------|---------------------|--------------------|----------------------|----------------------|------------------|----------------------------|-----------|
| Temperature | Competition               | -                      | Chemistry         | -0.862              | 0                   | -                   | -0.824             | -2.27                | 0.62                 | Additive         | -                          | 3         |
| Temperature | Competition               | -                      | Chemistry         | -1.33               | -1.27               | -                   | 0.434              | -0.968               | 1.84                 | Additive         | -                          | 3         |
| Temperature | Competition               | -                      | Chemistry         | -3.62               | -0.424              | -                   | -3.17              | -5.25                | -1.09                | Synergistic      | Negative                   | 3         |
| Temperature | High nutrients - water    | -                      | Chemistry         | -3.54               | -1.65               | -                   | -1.18              | -2.91                | 0.557                | Additive         | -                          | 4         |
| Temperature | High nutrients - water    | -                      | Chemistry         | -0.531              | -1.98               | -                   | -1.28              | -3.04                | 0.474                | Additive         | -                          | 4         |
| Temperature | High nutrients - water    | -                      | Chemistry         | -0.958              | -1.05               | -                   | -1.72              | -0.359               | 0.155                | Additive         | -                          | 4         |
| Temperature | High nutrients - sediment | -                      | Chemistry         | -0.718              | 0.105               | -                   | -1.79              | -3.68                | 0.105                | Additive         | -                          | 4         |
| Temperature | High nutrients - sediment | -                      | Chemistry         | 0.868               | 0.964               | -                   | -0.695             | -2.34                | 0.953                | Additive         | -                          | 4         |
| Temperature | High nutrients - sediment | -                      | Chemistry         | 1                   | -0.767              | -                   | -1.3               | -3.06                | 0.463                | Additive         | -                          | 4         |
| Light       | High nutrients - water    | -                      | Chemistry         | 8.24                | 8.06                | -                   | 9.5                | 3.89                 | 15.1                 | Synergistic      | Positive                   | 5         |
| Temperature | Light                     | High nutrients - water | Chemistry         | 4.55                | 8.24                | 8.06                | 9.41               | 3.85                 | 15                   | Synergistic      | Positive                   | 5         |
| Temperature | Light                     | -                      | Chemistry         | 4.55                | 8.24                | -                   | 8.65               | 3.5                  | 13.8                 | Synergistic      | Positive                   | 5         |
| Temperature | High nutrients - water    | -                      | Chemistry         | 4.55                | 8.06                | -                   | 8.66               | 3.5                  | 13.8                 | Synergistic      | Positive                   | 5         |
| Light       | High nutrients - water    | -                      | Chemistry         | 2.23                | 3.1                 | -                   | 3.12               | 0.739                | 5.51                 | Synergistic      | Positive                   | 5         |
| Temperature | Light                     | High nutrients - water | Chemistry         | 1.85                | 2.23                | 3.1                 | 2.89               | 0.6                  | 5.17                 | Synergistic      | Positive                   | 5         |
| Temperature | Light                     | -                      | Chemistry         | 1.85                | 2.23                | -                   | 2.43               | 0.322                | 4.54                 | Synergistic      | Positive                   | 5         |
| Temperature | High nutrients - water    | -                      | Chemistry         | 1.85                | 3.1                 | -                   | 3.38               | 0.884                | 5.87                 | Synergistic      | Positive                   | 5         |

| Stressor A                | Stressor B                | Stressor C             | Response variable | Individual effect A | Individual effect B | Individual effect C | Interaction effect | Interaction lower CI | Interaction upper CI | Interaction type | Direction (if synergistic) | Reference |
|---------------------------|---------------------------|------------------------|-------------------|---------------------|---------------------|---------------------|--------------------|----------------------|----------------------|------------------|----------------------------|-----------|
| Light                     | High nutrients - water    | -                      | Chemistry         | -1.43               | -5.14               | -                   | -8.61              | -13.7                | -3.48                | Synergistic      | Negative                   | 5         |
| Temperature               | Light                     | High nutrients - water | Chemistry         | -0.634              | -1.43               | -5.14               | -3.98              | -6.74                | -1.22                | Synergistic      | Negative                   | 5         |
| Temperature               | Light                     | -                      | Chemistry         | -0.634              | -1.43               | -                   | -1.7               | -3.57                | 0.167                | Additive         | -                          | 5         |
| Temperature               | High nutrients - water    | -                      | Chemistry         | -0.634              | -5.14               | -                   | -3.52              | -6.08                | -0.966               | Synergistic      | Negative                   | 5         |
| Light                     | High nutrients - water    | -                      | Chemistry         | -2.29               | -2.24               | -                   | -2.79              | -5.04                | -0.544               | Synergistic      | Negative                   | 5         |
| Temperature               | Light                     | High nutrients - water | Chemistry         | -0.712              | -2.29               | -2.24               | -1.23              | -2.98                | 0.512                | Additive         | -                          | 5         |
| Temperature               | Light                     | -                      | Chemistry         | -0.712              | -2.29               | -                   | -1.45              | -3.25                | 0.35                 | Additive         | -                          | 5         |
| Temperature               | High nutrients - water    | -                      | Chemistry         | -0.712              | -2.24               | -                   | -0.579             | -2.21                | 1.05                 | Additive         | -                          | 5         |
| CO2                       | Competition               | -                      | Chemistry         | -1.31               | -0.412              | -                   | -1.13              | -2.85                | 0.593                | Additive         | -                          | 8         |
| CO2                       | Competition               | -                      | Chemistry         | 0.461               | 0.921               | -                   | 0.921              | -0.762               | 2.6                  | Additive         | -                          | 8         |
| Habitat modification      | Herbivory                 | -                      | Chemistry         | 1.74                | 0.194               | -                   | 1.79               | 0.756                | 2.83                 | Synergistic      | Positive                   | 19        |
| Herbivory                 | High nutrients - water    | -                      | Chemistry         | -0.175              | 3.21                | -                   | 2.26               | 0.213                | 4.31                 | Antagonistic     | -                          | 26        |
| Photosynthesis inhibition | High nutrients - sediment | -                      | Chemistry         | 0.0269              | NA                  | -                   | -0.349             | -1.96                | 1.26                 | Additive         | -                          | 28        |
| Photosynthesis inhibition | High nutrients - sediment | -                      | Chemistry         | 0.287               | NA                  | -                   | 0.0048             | -1.6                 | 1.61                 | Additive         | -                          | 28        |
| Photosynthesis inhibition | High nutrients - sediment | -                      | Chemistry         | 0.772               | NA                  | -                   | 1.17               | -0.56                | 2.9                  | Additive         | -                          | 28        |
| Burial                    | High nutrients - sediment | -                      | Epiphytes         | 0.426               | 0.148               | -                   | -1.7               | -2.78                | -0.621               | Antagonistic     | -                          | 6         |
| Organic matter            | Suspended sediment        | -                      | Epiphytes         | -4.6                | -5.31               | -                   | -5.16              | -7.74                | -2.58                | Synergistic      | Positive                   | 16        |
| Hyposalinity              | Herbivory                 | -                      | Epiphytes         | 0.694               | 0.694               | -                   | 0.685              | -0.962               | 2.33                 | Additive         | -                          | 23        |

| Stressor A  | Stressor B                | Stressor C | Response variable | Individual effect A | Individual effect B | Individual effect C | Interaction effect | Interaction lower CI | Interaction upper CI | Interaction type | Direction (if synergistic) | Reference |
|-------------|---------------------------|------------|-------------------|---------------------|---------------------|---------------------|--------------------|----------------------|----------------------|------------------|----------------------------|-----------|
| Temperature | Hyposalinity              | Herbivory  | Epiphytes         | 0.404               | 0.626               | 0.694               | 0.614              | -1.02                | 2.25                 | Additive         | -                          | 23        |
| Temperature | Hyposalinity              | -          | Epiphytes         | 0.404               | 0.626               | -                   | 0.812              | -0.853               | 2.48                 | Additive         | -                          | 23        |
| Temperature | Herbivory                 | -          | Epiphytes         | 0.404               | 0.694               | -                   | 0.682              | -0.964               | 2.33                 | Additive         | -                          | 23        |
| Hypoxia     | High nutrients - sediment | -          | Epiphytes         | 0                   | -1.05               | -                   | -5.83              | -9.49                | -2.16                | Synergistic      | Negative                   | 25        |
| Herbivory   | High nutrients - water    | -          | Epiphytes         | 4.25                | -21.5               | -                   | -14.3              | -22.5                | -6.05                | Synergistic      | Negative                   | 26        |
| Herbivory   | High nutrients - water    | -          | Epiphytes         | -1.47               | 0.639               | -                   | -1.03              | -2.35                | 0.291                | Synergistic      | Negative                   | 31        |
| Pollution   | Acidification             | -          | Growth            | 0.895               | 0.356               | -                   | 0.447              | -0.165               | 1.06                 | Additive         | -                          | 2         |
| Pollution   | Acidification             | -          | Growth            | 2.37                | -0.103              | -                   | 1.44               | 0.76                 | 2.12                 | Antagonistic     | -                          | 2         |
| Pollution   | Acidification             | -          | Growth            | 1.26                | -0.0427             | -                   | 0.683              | 0.0606               | 1.31                 | Antagonistic     | -                          | 2         |
| Pollution   | Acidification             | -          | Growth            | 1.75                | 0.72                | -                   | -1.17              | -2.39                | 0.0556               | Additive         | -                          | 2         |
| Pollution   | Acidification             | -          | Growth            | 2.9                 | 0                   | -                   | 0.362              | -0.779               | 1.5                  | Additive         | -                          | 2         |
| Temperature | Competition               | -          | Growth            | -0.631              | -0.721              | -                   | -0.239             | -1.63                | 1.15                 | Additive         | -                          | 3         |
| Temperature | High nutrients - water    | -          | Growth            | 2.89                | -0.509              | -                   | 3.02               | 0.676                | 5.36                 | Synergistic      | Positive                   | 4         |
| Temperature | High nutrients - water    | -          | Growth            | 2.07                | 0.128               | -                   | 1.89               | -0.0371              | 3.81                 | Additive         | -                          | 4         |
| Temperature | High nutrients - sediment | -          | Growth            | 0.439               | -1.04               | -                   | 1.51               | -0.305               | 3.32                 | Additive         | -                          | 4         |
| Temperature | High nutrients - sediment | -          | Growth            | 9.71                | 2.08                | -                   | 6.15               | 2.32                 | 9.98                 | Synergistic      | Positive                   | 4         |
| Temperature | High nutrients - sediment | -          | Growth            | -0.755              | -0.195              | -                   | 1.38               | -0.403               | 3.16                 | Additive         | -                          | 4         |
| Light       | High nutrients - water    | -          | Growth            | 1.66                | 1.01                | -                   | 3.09               | 0.719                | 5.46                 | Synergistic      | Positive                   | 5         |

| Stressor A  | Stressor B                | Stressor C             | Response variable | Individual effect A | Individual effect B | Individual effect C | Interaction effect | Interaction lower CI | Interaction upper CI | Interaction type | Direction (if synergistic) | Reference |
|-------------|---------------------------|------------------------|-------------------|---------------------|---------------------|---------------------|--------------------|----------------------|----------------------|------------------|----------------------------|-----------|
| Temperature | Light                     | High nutrients - water | Growth            | 2.63                | 1.66                | 1.01                | 7.01               | 2.73                 | 11.3                 | Synergistic      | Positive                   | 5         |
| Temperature | Light                     | -                      | Growth            | 2.63                | 1.66                | -                   | 5.55               | 2.03                 | 9.07                 | Synergistic      | Positive                   | 5         |
| Temperature | High nutrients - water    | -                      | Growth            | 2.63                | 1.01                | -                   | 4.95               | 1.72                 | 8.17                 | Synergistic      | Positive                   | 5         |
| Light       | High nutrients - water    | -                      | Growth            | 2.32                | 1.44                | -                   | 1.25               | -0.497               | 3                    | Additive         | -                          | 5         |
| Temperature | Light                     | High nutrients - water | Growth            | 1.44                | 2.32                | 1.44                | 3.41               | 0.902                | 5.91                 | Synergistic      | Positive                   | 5         |
| Temperature | Light                     | -                      | Growth            | 1.44                | 2.32                | -                   | 3.25               | 0.815                | 5.69                 | Synergistic      | Positive                   | 5         |
| Temperature | High nutrients - water    | -                      | Growth            | 1.44                | 1.44                | -                   | 0.649              | -0.993               | 2.29                 | Additive         | -                          | 5         |
| Light       | High nutrients - water    | -                      | Growth            | 2.81                | 1.18                | -                   | 2.02               | 0.0512               | 3.98                 | Synergistic      | Positive                   | 5         |
| Temperature | Light                     | High nutrients - water | Growth            | 1.99                | 2.81                | 1.18                | 4.81               | 1.65                 | 7.96                 | Synergistic      | Positive                   | 5         |
| Temperature | Light                     | -                      | Growth            | 1.99                | 2.81                | -                   | 2.68               | 0.476                | 4.89                 | Synergistic      | Positive                   | 5         |
| Temperature | High nutrients - water    | -                      | Growth            | 1.99                | 1.18                | -                   | 1.39               | -0.394               | 3.17                 | Additive         | -                          | 5         |
| Light       | High nutrients - water    | -                      | Growth            | 1.2                 | -0.37               | -                   | 0.206              | -1.4                 | 1.81                 | Additive         | -                          | 5         |
| Temperature | Light                     | High nutrients - water | Growth            | -0.0375             | 1.2                 | -0.37               | 1.4                | -0.387               | 3.18                 | Additive         | -                          | 5         |
| Temperature | Light                     | -                      | Growth            | -0.0375             | 1.2                 | -                   | 0.881              | -0.795               | 2.56                 | Additive         | -                          | 5         |
| Temperature | High nutrients - water    | -                      | Growth            | -0.0375             | -0.37               | -                   | 0.667              | -0.977               | 2.31                 | Additive         | -                          | 5         |
| Burial      | High nutrients - sediment | -                      | Growth            | 0.116               | -0.772              | -                   | -0.964             | -1.94                | 0.012                | Additive         | -                          | 6         |



| Stressor A                | Stressor B                | Stressor C | Response variable | Individual effect A | Individual effect B | Individual effect C | Interaction effect | Interaction lower CI | Interaction upper CI | Interaction type | Direction (if synergistic) | Reference |
|---------------------------|---------------------------|------------|-------------------|---------------------|---------------------|---------------------|--------------------|----------------------|----------------------|------------------|----------------------------|-----------|
| Light                     | Desiccation               | -          | Growth            | 0.606               | 1.01                | -                   | 1.53               | 0.122                | 2.94                 | Synergistic      | Positive                   | 7         |
| CO2                       | Competition               | -          | Growth            | -0.736              | 0.106               | -                   | -0.417             | -2.03                | 1.2                  | Additive         | -                          | 8         |
| CO2                       | Competition               | -          | Growth            | -0.854              | -0.0678             | -                   | -0.679             | -2.33                | 0.966                | Additive         | -                          | 8         |
| CO2                       | Competition               | -          | Growth            | -1.37               | 0.361               | -                   | 0.181              | -1.42                | 1.78                 | Additive         | -                          | 8         |
| Temperature               | Photosynthesis inhibition | -          | Growth            | -1.74               | -8.87               | -                   | -8.24              | 11.1                 | -5.39                | Synergistic      | Negative                   | 9         |
| Low nutrients - sediment  | Infection                 | -          | Growth            | 1.5                 | 0.0986              | -                   | 2.11               | 0.111                | 4.1                  | Synergistic      | Positive                   | 10        |
| Low nutrients - sediment  | Infection                 | -          | Growth            | 0.767               | 1.52                | -                   | 1.65               | -0.203               | 3.5                  | Additive         | -                          | 10        |
| Low nutrients - sediment  | Infection                 | -          | Growth            | -0.563              | -0.439              | -                   | -0.436             | -2.06                | 1.18                 | Additive         | -                          | 10        |
| Hypersalinity             | Infection                 | -          | Growth            | -3.57               | 1.08                | -                   | 0.744              | -0.538               | 2.03                 | Additive         | -                          | 11        |
| Temperature               | Infection                 | -          | Growth            | -0.642              | 0.713               | -                   | 0.707              | -0.57                | 1.99                 | Additive         | -                          | 11        |
| Photosynthesis inhibition | Infection                 | -          | Growth            | 0.128               | 0.53                | -                   | 0.754              | -0.529               | 2.04                 | Additive         | -                          | 11        |
| Hypoxia                   | Infection                 | -          | Growth            | -0.336              | 0.675               | -                   | 0.692              | -0.584               | 1.97                 | Additive         | -                          | 11        |
| Hyposalinity              | High nutrients - water    | -          | Growth            | -0.793              | -2.28               | -                   | -0.985             | -2.68                | 0.71                 | Additive         | -                          | 13        |
| Hyposalinity              | High nutrients - water    | -          | Growth            | -0.369              | 0.109               | -                   | 0.00819            | -1.59                | 1.61                 | Additive         | -                          | 13        |
| Hyposalinity              | High nutrients - water    | -          | Growth            | 1.89                | -6.14               | -                   | -2.21              | -4.24                | -0.179               | Synergistic      | Negative                   | 13        |
| Hyposalinity              | High nutrients - water    | -          | Growth            | 1.37                | -1.79               | -                   | -2.09              | -4.08                | -0.0983              | Synergistic      | Negative                   | 13        |
| Hyposalinity              | Temperature               | -          | Growth            | 2.25                | -0.293              | -                   | 5.34               | 1.92                 | 8.77                 | Antagonistic     | -                          | 14        |
| Hyposalinity              | Temperature               | -          | Growth            | 0.857               | 0.0932              | -                   | 5.93               | 2.21                 | 9.65                 | Synergistic      | Positive                   | 14        |
| Hyposalinity              | Temperature               | -          | Growth            | 0.391               | -0.23               | -                   | 1.73               | -0.146               | 3.61                 | Additive         | -                          | 14        |
| Hyposalinity              | Temperature               | -          | Growth            | -0.696              | 0.354               | -                   | 1.79               | -0.106               | 3.68                 | Additive         | -                          | 14        |

| Stressor A           | Stressor B                | Stressor C | Response variable | Individual effect A | Individual effect B | Individual effect C | Interaction effect | Interaction lower CI | Interaction upper CI | Interaction type | Direction (if synergistic) | Reference |
|----------------------|---------------------------|------------|-------------------|---------------------|---------------------|---------------------|--------------------|----------------------|----------------------|------------------|----------------------------|-----------|
| Temperature          | High nutrients - water    | -          | Growth            | -0.844              | -0.54               | -                   | -0.925             | -2.61                | 0.759                | Additive         | -                          | 15        |
| Temperature          | High nutrients - water    | -          | Growth            | -0.642              | -0.216              | -                   | -1.24              | -2.98                | 0.509                | Additive         | -                          | 15        |
| Light                | High nutrients - water    | -          | Growth            | -1.38               | -0.859              | -                   | -0.639             | -2.28                | 1                    | Additive         | -                          | 14        |
| Light                | High nutrients - water    | -          | Growth            | -0.327              | -0.378              | -                   | 1.81               | -0.0885              | 3.71                 | Additive         | -                          | 14        |
| Light                | High nutrients - water    | -          | Growth            | -1.65               | -2.27               | -                   | 0.618              | -1.02                | 2.26                 | Additive         | -                          | 14        |
| Light                | High nutrients - water    | -          | Growth            | 0.739               | -0.077              | -                   | 4.92               | 1.71                 | 8.13                 | Antagonistic     | -                          | 14        |
| Habitat modification | Herbivory                 | -          | Growth            | 1.71                | 1.25                | -                   | 2.33               | 1.19                 | 3.46                 | Synergistic      | Positive                   | 19        |
| Temperature          | Competition               | -          | Growth            | 0.417               | 4.07                | -                   | 3.32               | 1.41                 | 5.24                 | Synergistic      | Positive                   | 22        |
| Temperature          | Competition               | -          | Growth            | 0.874               | 4.78                | -                   | 5.29               | 2.66                 | 7.92                 | Synergistic      | Positive                   | 22        |
| Temperature          | Competition               | -          | Growth            | 2.07                | 4.03                | -                   | 3.69               | 1.65                 | 5.73                 | Synergistic      | Positive                   | 22        |
| Temperature          | Competition               | -          | Growth            | 1.63                | 2.23                | -                   | 1.12               | 1.72                 | 5.87                 | Synergistic      | Positive                   | 22        |
| Hyposalinity         | Herbivory                 | -          | Growth            | 0.679               | 0.628               | -                   | 0.348              | -1.26                | 1.96                 | Additive         | -                          | 23        |
| Temperature          | Hyposalinity              | Herbivory  | Growth            | 0.792               | 0.679               | 0.628               | -0.0127            | -1.61                | 1.59                 | Additive         | -                          | 23        |
| Temperature          | Hyposalinity              | -          | Growth            | 0.792               | 0.679               | -                   | 0.474              | -1.15                | 2.1                  | Additive         | -                          | 23        |
| Temperature          | Herbivory                 | -          | Growth            | 0.792               | 0.628               | -                   | 0.371              | -1.24                | 1.98                 | Additive         | -                          | 23        |
| Hypoxia              | High nutrients - sediment | -          | Growth            | 0.738               | 2.91                | -                   | 6.99               | 2.72                 | 11.3                 | Synergistic      | Positive                   | 25        |
| Herbivory            | High nutrients - water    | -          | Growth            | -9.93               | 1.46                | -                   | -2.93              | -5.23                | -0.626               | Synergistic      | Negative                   | 26        |
| Light                | High nutrients - water    | -          | Growth            | 14.1                | -6.32               | -                   | 4.24               | 1.36                 | 7.13                 | Antagonistic     | -                          | 27        |
| Hypersalinity        | Photosynthesis inhibition | Hypoxia    | Growth            | 1.82                | 1.16                | -0.547              | 3.01               | 0.984                | 5.03                 | Synergistic      | Positive                   | 29        |

| Stressor A                | Stressor B                | Stressor C             | Response variable | Individual effect A | Individual effect B | Individual effect C | Interaction effect | Interaction lower CI | Interaction upper CI | Interaction type | Direction (if synergistic) | Reference |
|---------------------------|---------------------------|------------------------|-------------------|---------------------|---------------------|---------------------|--------------------|----------------------|----------------------|------------------|----------------------------|-----------|
| Hypersalinity             | Photosynthesis inhibition | -                      | Growth            | 1.82                | 1.16                | -                   | 2.4                | 0.581                | 4.22                 | Synergistic      | Positive                   | 29        |
| Hypersalinity             | Hypoxia                   | -                      | Growth            | 1.82                | -0.547              | -                   | 4.37               | 1.82                 | 6.92                 | Antagonistic     | -                          | 29        |
| Photosynthesis inhibition | Hypoxia                   | -                      | Growth            | 1.16                | -0.547              | -                   | -0.134             | -1.52                | 1.25                 | Additive         | -                          | 29        |
| Hypersalinity             | Photosynthesis inhibition | -                      | Growth            | 5.83                | 2.56                | -                   | 6.25               | 2.89                 | 9.62                 | Synergistic      | Positive                   | 29        |
| Temperature               | Photosynthesis inhibition | -                      | Growth            | 3.06                | 1.72                | -                   | 3.39               | 1.23                 | 5.56                 | Synergistic      | Positive                   | 30        |
| Temperature               | Photosynthesis inhibition | -                      | Growth            | -0.449              | -0.96               | -                   | 1.47               | 0.0908               | 3.03                 | Additive         | -                          | 30        |
| Temperature               | Photosynthesis inhibition | -                      | Growth            | 3.13                | -0.147              | -                   | 2.34               | 0.541                | 4.14                 | Antagonistic     | -                          | 30        |
| Temperature               | Photosynthesis inhibition | -                      | Growth            | -0.385              | 0.767               | -                   | 8.62               | 4.18                 | 13.1                 | Antagonistic     | -                          | 30        |
| Temperature               | Photosynthesis inhibition | -                      | Growth            | 0.445               | 1.92                | -                   | 0.631              | -0.789               | 2.05                 | Additive         | -                          | 30        |
| Light                     | Photosynthesis inhibition | -                      | Growth            | 0.147               | 0.0179              | -                   | 0.184              | -1.43                | 1.78                 | Additive         | -                          | 34        |
| Temperature               | Competition               | -                      | Mortality         | -8.61               | -0.699              | -                   | -4.55              | -7.18                | -1.93                | Synergistic      | Negative                   | 3         |
| Temperature               | High nutrients - water    | -                      | Mortality         | -0.661              | -0.604              | -                   | -1.71              | -3.58                | 0.161                | Additive         | -                          | 4         |
| Temperature               | High nutrients - sediment | -                      | Mortality         | -5.02               | -0.491              | -                   | -2.33              | -4.41                | -0.259               | Synergistic      | Negative                   | 4         |
| Light                     | High nutrients - water    | -                      | Mortality         | -0.543              |                     | -                   | -1.25              | -3                   | 0.499                | Additive         | -                          | 5         |
| Temperature               | Light                     | High nutrients - water | Mortality         | -0.547              | -0.543              | -                   | -2.68              | -4.88                | -0.474               | Synergistic      | Negative                   | 5         |
| Temperature               | Light                     | -                      | Mortality         | -0.547              | -0.543              | -                   | -0.805             | -2.47                | 0.859                | Additive         | -                          | 5         |

| Stressor A   | Stressor B                | Stressor C | Response variable | Individual effect A | Individual effect B | Individual effect C | Interaction effect | Interaction lower CI | Interaction upper CI | Interaction type | Direction (if synergistic) | Reference |
|--------------|---------------------------|------------|-------------------|---------------------|---------------------|---------------------|--------------------|----------------------|----------------------|------------------|----------------------------|-----------|
| Temperature  | High nutrients - water    | -          | Mortality         | -0.547              |                     | -                   | -0.965             | -2.66                | 0.726                | Additive         | -                          | 5         |
| Burial       | High nutrients - sediment | -          | Mortality         | -1.15               | -0.849              | -                   | -0.869             | -1.84                | 0.0975               | Additive         | -                          | 6         |
| Light        | Habitat modification      | -          | Mortality         | -1.79               | 0.0202              | -                   | -10.3              | -14.6                | -6.04                | Synergistic      | Negative                   | 12        |
| Hyposalinity | High nutrients - water    | -          | Mortality         | -1.2                | -0.98               | -                   | -0.741             | -2.39                | 0.914                | Additive         | -                          | 13        |
| Hyposalinity | Temperature               | -          | Mortality         | -0.0739             | -0.387              | -                   | -2.21              | -4.24                | 0.18                 | Synergistic      | Negative                   | 14        |
| Hyposalinity | Temperature               | -          | Mortality         | -0.000242           | -0.0694             | -                   | -0.44              | -2.06                | 1.18                 | Additive         | -                          | 14        |
| Hyposalinity | Temperature               | -          | Mortality         | -0.0212             | -0.675              | -                   | -2.78              | -5.2                 | -0.535               | Synergistic      | Negative                   | 14        |
| Hyposalinity | Temperature               | -          | Mortality         | -0.358              | -0.61               | -                   | -1.08              | -2.8                 | 0.632                | Additive         | -                          | 14        |
| Light        | High nutrients - water    | -          | Mortality         | 0.624               | -2.3                | -                   | -4.14              | -6.97                | -1.3                 | Synergistic      | Negative                   | 14        |
| Competition  | Herbivory                 | -          | Mortality         | -5.02               | -0.332              | -                   | -2.73              | -4.95                | -0.505               | Synergistic      | Negative                   | 21        |
| Temperature  | Competition               | Herbivory  | Mortality         | -1.42               | -5.02               | -0.332              | -3.32              | -5.79                | -0.854               | Synergistic      | Negative                   | 21        |
| Temperature  | Competition               | -          | Mortality         | -1.42               | -5.02               | -                   | -2.95              | -5.26                | -0.637               | Synergistic      | Negative                   | 21        |
| Temperature  | Herbivory                 | -          | Mortality         | -1.42               | -0.332              | -                   | -2.34              | -4.41                | -0.261               | Synergistic      | Negative                   | 21        |
| Competition  | Herbivory                 | -          | Mortality         | -1.42               | 0.236               | -                   | -1.52              | -3.33                | 0.298                | Additive         | -                          | 21        |
| Temperature  | Competition               | Herbivory  | Mortality         | -0.733              | -1.42               | 0.236               | -1.67              | -3.52                | 0.191                | Additive         | -                          | 21        |
| Temperature  | Competition               | -          | Mortality         | -0.733              | -1.42               | -                   | -1.96              | -3.9                 | -0.00982             | Synergistic      | Negative                   | 21        |
| Temperature  | Herbivory                 | -          | Mortality         | -0.733              | 0.236               | -                   | -1.38              | -3.16                | 0.403                | Additive         | -                          | 21        |
| Herbivory    | High nutrients - water    | -          | Mortality         | -1.54               | -1.21               | -                   | -1.22              | -2.56                | 0.134                | Additive         | -                          | 31        |
| Pollution    | Acidification             | -          | Survival          | 0                   | -0.291              | -                   | 0                  | -1.13                | 1.13                 | Additive         | -                          | 2         |
| Light        | High nutrients - water    | -          | Survival          | -0.651              | 0.519               | -                   | 0.0698             | -1.53                | 1.67                 | Additive         | -                          | 14        |
| Temperature  | Competition               | -          | Survival          | 1.86                | 0.595               | -                   | 5.47               | 1.99                 | 8.95                 | Synergistic      | Positive                   | 24        |

| Stressor A    | Stressor B                | Stressor C | Response variable | Individual effect A | Individual effect B | Individual effect C | Interaction effect | Interaction lower CI | Interaction upper CI | Interaction type | Direction (if synergistic) | Reference |
|---------------|---------------------------|------------|-------------------|---------------------|---------------------|---------------------|--------------------|----------------------|----------------------|------------------|----------------------------|-----------|
| Hypoxia       | High nutrients - sediment | -          | Survival          | -0.048              | 1.63                | -                   | 2.64               | 0.449                | 4.82                 | Antagonistic     | -                          | 25        |
| Hypersalinity | Photosynthesis inhibition | -          | Survival          | 2.99                | 1.22                | -                   | 3.34               | 1.2                  | 5.49                 | Synergistic      | Positive                   | 29        |

## References

- 1 Hedges, L. V. & Olkin, I. *Statistical methods for meta-analysis*. (Academic press, 1985).
- 2 de los Santos, C., Arenas, F., Neuparth, T. & Santos, M. M. Interaction of short-term copper pollution and ocean acidification in seagrass ecosystems: Toxicity, bioconcentration and dietary transfer. *Mar. Pollut. Bull.* **142**, 155-163 (2019).
- 3 Pereda-Briones, L., Terrados, J. & Tomas, F. Negative effects of warming on seagrass seedlings are not exacerbated by invasive algae. *Mar. Pollut. Bull.* **141**, 36-45, doi:10.1016/j.marpolbul.2019.01.049 (2019).
- 4 Ontoria, Y. *et al.* Interactive effects of global warming and eutrophication on a fast-growing Mediterranean seagrass. *Marine Environmental Research* **145**, 27-38, doi:10.1016/j.marenvres.2019.02.002 (2019).
- 5 Moreno-Marin, F., Brun, F. G. & Pedersen, M. F. Additive response to multiple environmental stressors in the seagrass *Zostera marina* L. *Limnology and Oceanography* **63**, 1528-1544, doi:10.1002/lno.10789 (2018).
- 6 Ceccherelli, G. *et al.* Seagrass collapse due to synergistic stressors is not anticipated by phenological changes. *Oecologia* **186**, 1137-1152, doi:10.1007/s00442-018-4075-9 (2018).
- 7 Suykerbuyk, W. *et al.* Living in the intertidal: desiccation and shading reduce seagrass growth, but high salinity or population of origin have no additional effect. *Peerj* **6**, 5234, doi:10.7717/peerj.5234 (2018).
- 8 Young, C. S., Peterson, B. J. & Gobler, C. J. The bloom-forming macroalgae, *Ulva*, outcompetes the seagrass, *Zostera marina*, under high CO<sub>2</sub> conditions. *Estuar. Coasts* **41**, 1-16, doi:10.1007/s12237-018-0437-0 (2018).

- 9 Wilkinson, A. D. *et al.* Combined effects of temperature and the herbicide diuron on Photosystem II activity of the tropical seagrass *Halophila ovalis*. *Sci. Rep.* **7**, 45404, doi:10.1038/srep45404 (2017).
- 10 Brakel, J., Reusch, T. B. H. & Bockelmann, A. C. Moderate virulence caused by the protist *Labyrinthula zosterae* in ecosystem foundation species *Zostera marina* under nutrient limitation. *Mar. Ecol. Prog. Ser.* **571**, 97-108, doi:10.3354/meps12104 (2017).
- 11 Bishop, N., Martin, D. L. & Ross, C. Effects of multi-stress exposure on the infection dynamics of a *Labyrinthula* sp.-turtle grass pathosystem. *Mar. Ecol. Prog. Ser.* **581**, 119-133, doi:10.3354/meps12318 (2017).
- 12 Hasler-Sheetal, H., Castorani, M. C. N., Glud, R. N., Canfield, D. E. & Holmer, M. Metabolomics reveals cryptic interactive effects of species interactions and environmental stress on nitrogen and sulfur metabolism in seagrass. *Environmental Science & Technology* **50**, 11602-11609, doi:10.1021/acs.est.6b04647 (2016).
- 13 Villazan, B., Salo, T., Brun, F. G., Vergara, J. J. & Pedersen, M. F. High ammonium availability amplifies the adverse effect of low salinity on eelgrass *Zostera marina*. *Mar. Ecol. Prog. Ser.* **536**, 149-162, doi:10.3354/meps11435 (2015).
- 14 Salo, T. & Pedersen, M. F. Synergistic effects of altered salinity and temperature on estuarine eelgrass (*Zostera marina*) seedlings and clonal shoots. *J. Exp. Mar. Biol. Ecol.* **457**, 143-150, doi:10.1016/j.jembe.2014.04.008 (2014).
- 15 Kaldy, J. E. Effect of temperature and nutrient manipulations on eelgrass *Zostera marina* L. from the Pacific Northwest, USA. *J. Exp. Mar. Biol. Ecol.* **453**, 108-115, doi:10.1016/j.jembe.2013.12.020 (2014).

- 16 Govers, L. L. *et al.* Seagrasses are negatively affected by organic matter loading and *Arenicola marina* activity in a laboratory experiment. *Oecologia* **175**, 677-685, doi:10.1007/s00442-014-2916-8 (2014).
- 17 Fraser, M. W. *et al.* Extreme climate events lower resilience of foundation seagrass at edge of biogeographical range. *Journal of Ecology* **102**, 1528-1536, doi:10.1111/1365-2745.12300 (2014).
- 18 Villazan, B., Pedersen, M. F., Brun, F. G. & Vergara, J. J. Elevated ammonium concentrations and low light form a dangerous synergy for eelgrass *Zostera marina*. *Mar. Ecol. Prog. Ser.* **493**, 141-154, doi:10.3354/meps10517 (2013).
- 19 Gera, A., Pages, J. F., Romero, J. & Alcoverro, T. Combined effects of fragmentation and herbivory on *Posidonia oceanica* seagrass ecosystems. *Journal of Ecology* **101**, 1053-1061, doi:10.1111/1365-2745.12109 (2013).
- 20 Suykerbuyk, W. *et al.* Suppressing antagonistic bioengineering feedbacks doubles restoration success. *Ecological Applications* **22**, 1224-1231, doi:10.1890/11-1625.1 (2012).
- 21 Hoffle, H., Wernberg, T., Thomsen, M. S. & Holmer, M. Drift algae, an invasive snail and elevated temperature reduce ecological performance of a warm-temperate seagrass, through additive effects. *Mar. Ecol. Prog. Ser.* **450**, 67-85, doi:10.3354/meps09552 (2012).
- 22 Holmer, M., Wirachwong, P. & Thomsen, M. S. Negative effects of stress-resistant drift algae and high temperature on a small ephemeral seagrass species. *Mar. Biol.* **158**, 297-309, doi:10.1007/s00227-010-1559-5 (2011).
- 23 Blake, R. E. & Duffy, J. E. Grazer diversity affects resistance to multiple stressors in an experimental seagrass ecosystem. *Oikos* **119**, 1625-1635, doi:10.1111/j.1600-0706.2010.18419.x (2010).



- 24 Martinez-Luscher, J. & Holmer, M. Potential effects of the invasive species *Gracilaria vermiculophylla* on *Zostera marina* metabolism and survival. *Marine Environmental Research* **69**, 345-349, doi:10.1016/j.marenvres.2009.12.009 (2010).
- 25 Mascaro, O., Valdemarsen, T., Holmer, M., Perez, M. & Romero, J. Experimental manipulation of sediment organic content and water column aeration reduces *Zostera marina* (eelgrass) growth and survival. *J. Exp. Mar. Biol. Ecol.* **373**, 26-34, doi:10.1016/j.jembe.2009.03.001 (2009).
- 26 Jaschinski, S. & Sommer, U. Top-down and bottom-up control in an eelgrass-epiphyte system. *Oikos* **117**, 754-762, doi:10.1111/j.2008.0030-1299.16455.x (2008).
- 27 Brun, F. G. *et al.* Increased vulnerability of *Zostera noltii* to stress caused by low light and elevated ammonium levels under phosphate deficiency. *Mar. Ecol. Prog. Ser.* **365**, 67-75, doi:10.3354/meps07512 (2008).
- 28 Perez, M., Invers, O., Ruiz, J. M., Frederiksen, M. S. & Holmer, M. Physiological responses of the seagrass *Posidonia oceanica* to elevated organic matter content in sediments: An experimental assessment. *J. Exp. Mar. Biol. Ecol.* **344**, 149-160, doi:10.1016/j.jembe.2006.12.020 (2007).
- 29 Koch, M. S., Schopmeyer, S. A., Holmer, M., Madden, C. J. & Kyhn-Hansen, C. *Thalassia testudinum* response to the interactive stressors hypersalinity, sulfide and hypoxia. *Aquatic Bot.* **87**, 104-110, doi:10.1016/j.aquabot.2007.03.004 (2007).
- 30 Koch, M. S., Schopmeyer, S., Kyhn-Hansen, C. & Madden, C. J. Synergistic effects of high temperature and sulfide on tropical seagrass. *J. Exp. Mar. Biol. Ecol.* **341**, 91-101, doi:10.1016/j.jembe.2006.10.004 (2007).
- 31 Douglass, J. G., Duffy, J. E., Spivak, A. C. & Richardson, J. P. Nutrient versus consumer control of community structure in a Chesapeake Bay eelgrass habitat. *Mar. Ecol. Prog. Ser.* **348**, 71-83, doi:10.3354/meps07091 (2007).

- 32 Kahn, A. E. & Durako, M. J. *Thalassia testudinum* seedling responses to changes in salinity and nitrogen levels. *J. Exp. Mar. Biol. Ecol.* **335**, 1-12, doi:10.1016/j.jembe.2006.02.011 (2006).
- 33 Koch, M. S. & Erskine, J. M. Sulfide as a phytotoxin to the tropical seagrass *Thalassia testudinum*: interactions with light, salinity and temperature. *J. Exp. Mar. Biol. Ecol.* **266**, 81-95, doi:10.1016/s0022-0981(01)00339-2 (2001).
- 34 Goodman, J. L., Moore, K. A. & Dennison, W. C. Photosynthetic responses of eelgrass (*Zostera-marina* L) to light and sediment sulfide in a shallow barrier-island lagoon. *Aquatic Bot.* **50**, 37-47, doi:10.1016/0304-3770(94)00444-q (1995).
